# Supplementary figures and images for: Carboxymethyl cellulose binders enable high-rate capability of sulfurized polyacrylonitrile cathodes for Li–S batteries
Source: Royal Society of Chemistry journal article supplement (doi:10.1039/c7ta00040e), 2017-01-01

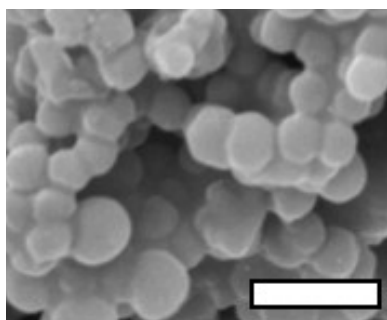

Figure S1. SEM image of original SPAN particles. The scale bar is 500 nm.

Supplement: c7ta00040e1.pdf [file c7ta00040e1.pdf]
